# INDEX OF SUBJECTS

## A

- Abalone:**  
*See Haliotis rufescens*
- Abdominal nerve cord:**  
 Unit activity in the, of a dragonfly nymph 31  
 — Some effects of the ionic composition of the extracellular fluid on the electrical activity of the cockroach 631
- Actinophrys:**  
 Desquamation in, induction and inhibition 359
- Ampullae of Lorenzini:**  
 The response of the, of elasmobranchs to electrical stimulation 119
- Aphysia depilans:**  
 Aspects of the organization of central nervous pathways in 45
- Aquatic insects:**  
 The composition of haemolymph in 325

## B

- Balanus balanus:**  
 The composition of the seminal plasma of 345
- Bifunctional muscles:**  
 In the thorax of grasshoppers 669
- Blowflies:**  
 The imaginal ecdysis of. The control of cuticular hardening and darkening 395  
 — The imaginal ecdysis of. Detection of the blood-borne darkening factor and determination of some of its properties 413  
 — The imaginal ecdysis of. Observations on the hydrostatic mechanisms involved in digging and expansion 431  
 — The imaginal ecdysis of. Evidence for a change in the mechanical properties of the cuticle at expansion 449  
 — *See also Calliphora erythrocephala* (Meig.); *Phorina regina* (Meig.)
- Bufo viridis L.:**  
 Osmotic regulation in the green toad 261

## C

- Caddis larvae (Trichoptera):**  
 Studies on salt and water balance in. III. Drinking and excretion 141
- Calliphora erythrocephala (Meig.):**  
 The relationship between nutrition, hormones and reproduction in the blowfly. III. The corpus allatum in relation to nutrition, the ovaries, innervation and the corpus cardiacum 293
- Carcinus maenas (L.):**  
 Peripheral reflex inhibition in the claw of the crab 71  
 — Proprioceptive reflexes in the legs of 89

## Central nervous pathways:

- Aspects of the organization of, in *Aplysia depilans* 45

## Central nervous system:

- The distribution and exchange of some ions and molecules in the, of *Periplaneta americana* L. 193

## Chitin synthesis:

- Studies on, in the desert locust 129

## Cicada song:

- The 479

## Cilium:

- Force exerted by a single, of *Mytilus edulis*. II. Free motion 307

## Co-ordinated motor units:

- Patterned activity of, studied in flying locusts 643

## Corpus cardiacum:

- The mode of action of the, on the hind gut in *Periplaneta americana* 319

## Crab-eating frog:

- See Rana cancrivora*

## D

### Dances:

- Of honeybees, at small zenith distances of the sun 271

### Desert locust:

- Studies on chitin synthesis in the 129

### Desquamation:

- In *Actinophrys*: induction and inhibition 359

### Developmental variability:

- Maternal age and 251

### Diadema setosum (Leake):

- The effect of light on the shadow reaction of the sea urchin 589

### Dogfish:

- See Squalus acanthias* L.

### Dogfish gill:

- Intrinsic vasomotion in the 503

### Dragonflies (Odonata):

- Spiracle control in adult 513

### Dragonfly nymph:

- Unit activity in the abdominal nerve cord of a 31

## E

### Earthworm:

- See Lumbricus terrestris* L.

### Eggs:

- The effect of resorbing, upon the sex ratio of the offspring in *Nasonia vitripennis* (Hymenoptera, Pteromalidae) 161

### Elasmobranchs:

- The response of the ampullae of Lorenzini of, to electrical stimulation 119

**Electrical activity:**

Some effects of the ionic composition of the extracellular fluid on the, of the cockroach abdominal nerve cord 631

**Electrical stimulation:**

The response of the ampullae of Lorenzini of elasmobranchs to 119

**Excretory processes:**

Some, in the abalone, *Haliotis rufescens* 179

**Extracellular fluid:**

Some effects of the ionic composition of the, on the electrical activity of the cockroach abdominal nerve cord 631

**F****Fish:**

Temperature acclimatization and the nervous system in 617

**Flight:**

Preparation for, by hawk-moths 579

**Fructolysis:**

Anaerobic heat production and, of bull spermatozoa at different temperatures 387

**G****Giant fibre reflex:**

The, of the earthworm, *Lumbricus terrestris* L.

I. The rapid response 219

— The, of the earthworm, *Lumbricus terrestris* L.

II. Fatigue 229

**Goldfish:**

The reaction of a blinded, to rotation in a centrifuge 491

**Grasshoppers:**

Bifunctional muscles in the thorax of 669

**Green toad:**

See *Bufo viridis* L. 261

**H****Haemolymph:**

The composition of, in aquatic insects 325

***Haliotis rufescens*:**

Some excretory processes in the abalone 179

**Hawk-moths:**

Preparation for flight by 579

**Heat production:**

Anaerobic, and fructolysis of bull spermatozoa at different temperatures 387

**Hind gut:**

The mode of action of the corpus cardiacum on the, in *Periplaneta americana* 319

**Honeybees:**

The dances of, at small zenith distances of the sun 271

**Hormones:**

The relationship between nutrition, and reproduction in the blowfly *Calliphora erythrocephala* (Meig.). III. The corpus allatum in relation to nutrition, the ovaries, innervation and the corpus cardiacum 293

**I****Imaginal ecdysis:**

The, of blowflies. The control of cuticular hardening and darkening 395

— The, of blowflies. Detection of the blood-borne darkening factor and determination of some of its properties 413

— The, of blowflies. Observations on the hydrostatic mechanisms involved in digging and expansion 431

— The, of blowflies. Evidence for a change in the mechanical properties of the cuticle at expansion 449

**Innervation:**

Of locomotor movements by the lumbosacral cord in birds and animals 239

**Intraocular discrimination:**

Evidence for the, of vertically and horizontally polarized light by *Octopus* 21

**Ionic composition:**

Some effects of the, of the extracellular fluid on the electrical activity of the cockroach abdominal nerve cord 631

**Ions:**

The distribution and exchange of some, and molecules in the central nervous system of *Periplaneta americana* L. 193

**K****Kidney function:**

In the crab-eating frog (*Rana cancrivora*) 167

**L****Learning:**

Olfactory and visual, in the red-eared terrapin, *Pseudemys scripta elegans* (Wied.) 567

**Light:**

The effect of, on the shadow reaction of the sea urchin, *Diadema setosum* (Leske) 589

**Locomotor movements:**

Innervation of, by the lumbosacral cord in birds and animals 239

**Locusts:**

Patterned activity of co-ordinated motor units, studied in flying 643

**Lumbosacral cord:**

Innervation of locomotor movements by the, in birds and animals 239

***Lumbricus terrestris* L.:**

The giant fibre reflex of the earthworm.

I. The rapid response 219

— The giant fibre reflex of the earthworm.

II. Fatigue 229

**M****Maternal age:**

And developmental variability 251

**Metabolism:**

The oxygen uptake and of *Balanus balanus* spermatozoa 353

**Molecules:**

The distribution and exchange of some ions and, in the central nervous system of *Periplaneta americana* L. 193

**Myo-neural physiology:**

Observations on the, of the polyclad *Planocera gilchristi* 459

**Mytilus edulis:**

Force exerted by a single cilium of. II. Free motion 307

**N****Nasonia vitripennis (Hymenoptera, Pteromalidae):**

The effect of resorbing eggs upon the sex ratio of the offspring in 161

**Nervous system:**

Temperature acclimatization and the, in fish 617

**Nutrition:**

The relationship between, hormones and reproduction in the blowfly *Calliphora erythrocephala* (Meig.). III. The corpus allatum in relation to nutrition, the ovaries, innervation and the corpus cardiacum 293

**O****Octopus:**

Simultaneous shape discrimination in, after removal of the vertical lobe 557

**Olfactory stimuli:**

And oviposition in the blowfly, *Phormia regina* (Meig.) 603

**Osmotic regulation:**

In the green toad (*Bufo viridis*) 261

**Oviposition:**

Olfactory stimuli and, in the blowfly, *Phormia regina* (Meig.) 603

**Oxygen uptake:**

The, and metabolism of *Balanus balanus* spermatozoa 353

**P****Patterned activity:**

Of co-ordinated motor units, studied in flying locusts 643

**Periplaneta americana L.:**

The distribution and exchange of some ions and molecules in the central nervous system of 193

— The mode of action of the corpus cardiacum on the hind gut in 319

**Pharyngeal proprioceptors:**

In the dogfish *Squalus acanthus* L. 000

**Phormia regina (Meig.):**

Olfactory stimuli and oviposition in the blowfly 603

**Planocera gilchristi:**

Observations on the myo-neural physiology of the polyclad 459

**Polarized light:**

Evidence for the intraocular discrimination of vertically and horizontally, by *Octopus* 21

**Polyclad:**

See *Planocera gilchristi*

**Proprioceptive reflexes:**

In the legs of *Carcinus maenas* (L.) 89

**Pseudemys scripta elegans (Wied.):**

Olfactory and visual learning in the red-eared terrapin 567

**R****Rana cancrivora:**

Kidney function in the crab-eating frog 167

**Red-eared terrapin:**

See *Pseudemys scripta elegans* (Wied.)

**Reflex inhibition:**

Peripheral, in the claw of the crab, *Carcinus maenas* (L.) 71

**Reproduction:**

The relationship between nutrition, hormones and, in the blowfly *Calliphora erythrocephala* (Meig.). III. The corpus allatum in relation to nutrition, the ovaries, innervation and the corpus cardiacum 293

**Reptiles:**

On the regulation of respiration in. II. The effect of hypoxia with and without moderate hypercapnia on the respiration and metabolism of lizards 107

**Respiration:**

On the regulation of, in reptiles. II. The effect of hypoxia with and without moderate hypercapnia on the respiration and metabolism of lizards 107

**S****Salt and water balance:**

Studies on, in caddis larvae (Trichoptera). III. Drinking and excretion 141

**Sea anemones:**

Visco-elastic properties of the body-wall of 373

**Sea urchin:**

See *Diadema setosum* (Leske)

**Seminal plasma:**

The composition of the, of *Balanus balanus* 345

**Sex ratio:**

The effect of resorbing eggs upon the, of the offspring in *Nasonia vitripennis* (Hymenoptera, Pteromalidae) 161

**Shadow reaction:**

The effect of light on the, of the sea urchin, *Diadema setosum* (Leske) 589

**Shape discrimination:**

Simultaneous, in *Octopus* after removal of the vertical lobe 557

**Speed:**

Training, and stamina in trout 537

**Spermatozoa:**

The oxygen uptake and metabolism of *Balanus balanus* 353

— Anaerobic heat production and fructolysis of bull, at different temperatures 387

**Spiracle control:**

In adult dragonflies (Odonata) 513

**Spirobis larvae (Serpulidae):**

Experiments on choice of substrata by 483

**Squalus Acanthias L.:**

Pharyngeal proprioceptors in the dogfish 243

**Stamina:**

Training, speed and, in trout 537

**Substrata:**Experiments on choice of, by *Spirobia* larvae  
(Serpulidae) 483**T****Temperature acclimatization:**

And the nervous system in fish 617

**Training:**

Speed and stamina in trout 537

**Trout:**

Training, speed and stamina in 537

**U****Unit activity:**In the abdominal nerve cord of a dragonfly  
nymph 31**V****Vasomotion:**

Intrinsic, in the dogfish gill 503

**Vertical lobe:**Simultaneous shape discrimination in *Octopus*  
after removal of the 557**Visco-elastic properties:**

Of the body-wall of sea anemones 373

**W****Water:**The uptake and distribution of, in the  
embryo of *Xenopus laevis* (Daudin) 1**Xenopus laevis (Daudin):**The uptake and distribution of water in the  
embryo of 1

# INDEX OF AUTHORS

## A

- Alexander, R. McN.** Visco-elastic properties of the body-wall of sea anemones 373

## B

- Bainbridge, Richard.** Training, speed and stamina in trout 537  
**Barnes, H.** The composition of the seminal plasma of *Balamus balanus* 345  
 — The oxygen uptake and metabolism of *Balamus balanus* spermatozoa 353  
**Boycott, B. B. and Guillery, R. W.** Olfactory and visual learning in the red-eared terrapin, *Pseudemys scripta elegans* (Wied.) 567  
**Bush, B. M. H.** Peripheral reflex inhibition in the claw of the crab, *Carcinus maenas* (L.) 71  
 — Proprioceptive reflexes in the legs of *Carcinus maenas* (L.) 89

## C

- Candy, D. W. and Kilby, B. A.** Studies on chitin synthesis in the desert locust 129  
**Cate, J. Ian.** Innervation of locomotor movements by the lumbrosacral cord in birds and animals 239  
**Cottrell, C. B.** The imaginal ecdysis of blowflies. The control of cuticular hardening and darkening 395  
 — The imaginal ecdysis of blowflies. Detection of the blood-borne darkening factor and determination of some of its properties 413  
 — The imaginal ecdysis of blowflies. Observations on the hydrostatic mechanisms involved in digging and expansion 431  
 — The imaginal ecdysis of blowflies. Evidence for a change in the mechanical properties of the cuticle at expansion 449

## D

- Davey, K. G.** The mode of action of the corpus cardiacum on the hind gut in *Periplanetum americana* 319  
**Dorsett, D. A.** Preparation for flight by hawk-moths 579

## E

- Ewer, D. W.** See GRUBER and EWER

## F

- Fielden, Ann and Hughes, G. M.** Unit activity in the abdominal nerve cord of a dragonfly nymph 21

## G

- Gordon, Malcolm S.** Osmotic regulation in the green toad (*Bufo viridis*) 261  
**Gruber, Sheila A. and Ewer, D. W.** Observations on the myo-neural physiology of the polyclad, *Planocera gilchristi* 459  
**Guillery, R. W.** See BOYCOTT and GUILLERY

## H

- Harrison, F. M.** Some excretory processes in the abalone, *Haliotis rufescens* 179  
**Howland, B.** See HOWLAND and HOWLAND  
**Howland, H. C. and Howland, B.** The reaction of a blinded goldfish to rotation in a centrifuge 491  
**Hughes, G. M.** See FIELDEN and HUGHES  
**Hughes, G. M. and Tauc, L.** Aspects of the organization of central nervous pathways in *Aplysia depilans* 45

## K

- Kilby, B. A.** See CANDY and KILBY  
**King, P. E.** The effect of resorbing eggs upon the sex ratio of the offspring in *Nasomia vitripennis* (Hymenoptera, Pteromalidae) 161  
**Kitching, J. A.** Desquamation in *Actinophrys*: induction and inhibition 359

## L

- Ladd Prosser, C.** See ROOTS and LADD PROSSER  
**Lee, Ping.** See SCHMIDT-NIELSEN and LEE

## M

- Miller, P. L.** Spiracle control in adult dragonflies (Odonata) 513  
**Moody, M. F.** Evidence for the intraocular discrimination of vertically and horizontally polarized light by *Octopus* 21  
**Muntz, W. R. A., Sutherland, N. S. and Young, J. Z.** Simultaneous shape discrimination in *Octopus* after removal of the vertical lobe 557  
**Murray, R. W.** The response of the ampullae of Lorenzini of elasmobranchs to electrical stimulation 119

## N

- Nakshbandi, M. and Zahlan, A.** The cicada song 479  
**New, D. A. T. and New, J. K.** The dances of honeybees at small zenith distances of the sun 271  
**New, J. K.** See NEW and NEW

- Nielson, Bodil.** On the regulation of respiration in reptiles. II. The effect of hypoxia with and without moderate hypercapnia on the respiration and metabolism of lizards 107

## P

- Parsons, P. A.** Maternal age and developmental variability 251

## R

- Roberts, M. V. E.** The giant fibre reflex of the earthworm, *Lumbricus terrestris* L. I. The rapid response 219  
 — The giant fibre reflex of the earthworm, *Lumbricus terrestris* L. II. Fatigue 229  
**Roots, Betty I. and Ladd Prosser, C.** Temperature acclimatization and the nervous system in fish 617  
**Rothschild, Lord.** Anaerobic heat production and fructolysis of bull spermatozoa at different temperatures 387

## S

- Satchell, G. H.** Intrinsic vasomotion in the dogfish gill 503  
**Satchell, G. H. and Way, H. K.** Pharyngeal proprioceptors in the dogfish *Squalus acanthias* L. 243  
**Schmidt-Nielsen, Knut and Lee, Ping.** Kidney function in the crab-eating frog (*Rana cancrivora*) 167  
**Silva, P. H. D. H. de.** Experiments on choice of substrata by *Spirobis* larvae (Serpulidae) 483  
**Strangways-Dixon, J.** The relationship between nutrition, hormones and reproduction in the blowfly *Calliphora erythrocephala* (Meig.). III. The corpus allatum in relation to nutrition, the ovaries, innervation and the corpus cardiacum 293  
**Sutcliffe, D. W.** Studies on salt and water balance in caddis larvae (Trichoptera). III. Drinking and excretion 141

- The composition of haemolymph in aquatic insects 325  
**Sutherland, N. S.** See MUNTZ, SUTHERLAND and YOUNG

## T

- Tauc, L.** See HUGHES and TAUC  
**Treherne, J. E.** The distribution and exchange of some ions and molecules in the central nervous system of *Periplaneta americana* L. 193  
 — Some effects of the ionic composition of the extracellular fluid on the electrical activity of the cockroach abdominal nerve cord 631  
**Tuft, P. H.** The uptake and distribution of water in the embryo of *Xenopus laevis* (Daudin) 1

## W

- Wallis, D. I.** Olfactory stimuli and oviposition in the blowfly, *Phormia regina* Meigen 603  
**Way, H. K.** See SATCHELL and WAY  
**Weis-Fogh, Torkel.** See WILSON and WEIS-FOGH  
**Wilson, Donald M.** Bifunctional muscles in the thorax of grasshoppers 669  
**Wilson, Donald M. and Weis-Fogh, Torkel.** Patterned activity of co-ordinated motor units, studied in flying locusts 643

## Y

- Yoneda, Mitsuki.** Force exerted by a single cilium of *Mytilus edulis*. II. Free motion 307  
**Yoshida, M.** The effect of light on the shadow reaction of the sea urchin, *Diadema setosum* (Leske) 589  
**Young, J. Z.** See MUNTZ, SUTHERLAND and YOUNG

## Z

- Zahlan, A.** See NAKSHBANDI and ZAHLAN
